# Supplementary material
Source: PubMed Central journal article supplement (PMC9233044)
Supplement: NIHMS1811109-supplement-1811109_Sup_fig_1.pdf [file NIHMS1811109-supplement-1811109_Sup_fig_1.pdf]

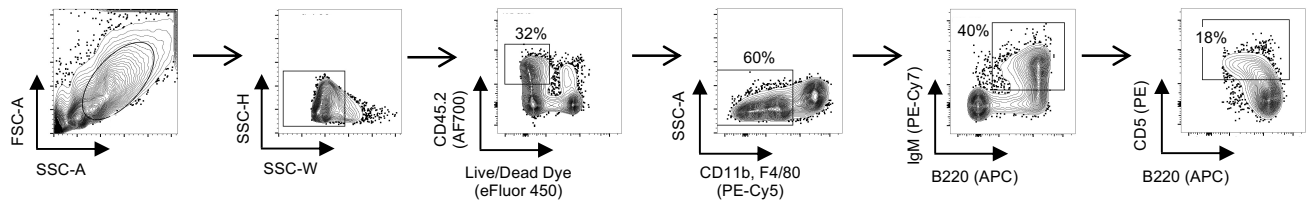

**Supplementary Figure 1: Gating strategy to identify B220+IgM+CD5+ B cells.** Related to Fig. 4f, g and Extended Data Fig. 10a-d.
